# Supplementary material for: Malleable and recyclable imide–imine hybrid thermosets: influence of imide structure on material property
Source: Royal Society of Chemistry journal article supplement (doi:10.1039/d1ma00311a), 2021-01-01
Supplement: d1ma00311a1.pdf [file d1ma00311a1.pdf]

## Supporting Information

### **Malleable and recyclable imide-imine hybrid thermosets: influence of imide structure on material property**

*Xiran Shen,<sup>a</sup> Yunlong Ma,<sup>a</sup> Shichang Luo,<sup>a</sup> Rao Tao,<sup>a</sup> Dan An,<sup>a</sup> Xinlei Wei,<sup>a</sup> Yinghua Jin,<sup>b</sup> Li Qiu,<sup>a,\*</sup> and Wei Zhang<sup>b,\*</sup>*

*<sup>a</sup>Yunnan Key Laboratory for Micro/Nano Materials & Technology, National Center for International Research on Photoelectric and Energy Materials, School of Materials and Energy, Yunnan University, Kunming 650091, P. R. China. E-mail: qiuli@ynu.edu.cn*

*<sup>b</sup>Department of Chemistry, University of Colorado, Boulder, Colorado 80309, USA. E-mail: wei.zhang@colorado.edu*

### Table of Contents

|                                                                      |     |
|----------------------------------------------------------------------|-----|
| 1. Materials and methods .....                                       | S2  |
| 2. Characterization .....                                            | S3  |
| 2.1 NMR spectra of Ims.....                                          | S3  |
| 2.2 FT-IR spectra of hybrid films and TPA.....                       | S6  |
| 2.3 Solid-state <sup>13</sup> C NMR spectra of hybrid materials..... | S7  |
| 2.4 Atomic force microscopy images of the hybrid films .....         | S9  |
| 2.5 Mechanical properties of the hybrid films .....                  | S10 |
| 2.7 Dynamic mechanical analysis (DMA) of the hybrid films.....       | S11 |
| 2.8 Thermal gravimetric analysis (TGA) of the hybrid films .....     | S12 |
| 3. Repairing of the hybrid films.....                                | S13 |
| 4. Recycling of the hybrid films.....                                | S17 |

## 1. Materials and methods

All chemical reagents and solvents were provided by commercial suppliers and used as received unless otherwise stated. 2,5-Dimethyl-1,4-phenylenediamine (DPD), 2,6-Diaminotoluene (DAT), 4,4'-(Hexafluoroisopropylidene) diphthalic anhydride (6FDA), 4,4'-Oxydiphthalic anhydride (ODPA), 3,3',4,4'-Benzophenonetetracarboxylic dianhydride (BTDA), Terephthalaldehyde (TPA) were purchased from Energy Chemical Co. Ltd. Triethylenetetramine (TREN) and diethylenetriamine (DETA) are used after low temperature storage. 1-Methyl-2-pyrrolidinone (NMP) and N,N-Dimethylformamide (DMF) were freshly distilled under reduced pressure over phosphorus pentoxide and stored over 4 Å molecular sieves prior to use.

The FT-IR spectra were measured utilizing a Nicolet IS50 FT-IR Spectrometer (Thermo Fisher Scientific). NMR spectra were taken on an AVANCE III 600 NMR spectrometer in deuterated solvents (DMSO-d<sub>6</sub>). DMSO (2.50 ppm) was used as internal references in <sup>1</sup>H NMR. <sup>1</sup>H NMR data were reported in order: chemical shift, multiplicity (s, singlet; d, doublet; t, triplet; q, quartet; m, multiplet; br, broad), and number of protons. Solid-state cross polarization magic angle spinning (CP/MAS) NMR spectra were recorded on an Inova 400 NMR spectrometer. Mass spectra were recorded on a UPLC-MS/MS system (Thermo Fisher Scientific, Waltham, United States).

The internal loss factor  $\tan \delta$  was determined on a DMA 242E instrument (NETZSCH, USA). All samples were subjected to the temperature scan mode at a programmed heating rate of 2 °C/min at a single frequency of 1 Hz from room temperature to 200 °C in a tensile mode with strain of 0.1% and preload force of 0.20 N. The glass transition temperature ( $T_g$ ) was taken from the maximum of the peak in the  $\alpha$ -transition region of the  $\tan \delta$  curve.

TGA measurements were carried out on a Mettler TGA/DSC/1600LF series thermogravimetric analyzer at a heating rate of 10 °C/min under inert atmosphere from room temperature to 800 °C.

The mechanical properties of imide-imine hybrid films were measured using a

Universal mechanical testing system (model: UTM4304, Shenzhen suns technology stock co. Ltd) on 3 spindle film strips (W=3.225 mm) with a gauge length measured after installing the sample at room temperature. Uniaxial tension load with loading speed of 2 mm/min was used for static tension test. Uniaxial tensile strength test standard was ASTM D638. The tensile modulus was taken as the initial slope of the stress–strain curves.

## 2. Characterization

### 2.1 NMR spectra of Ims

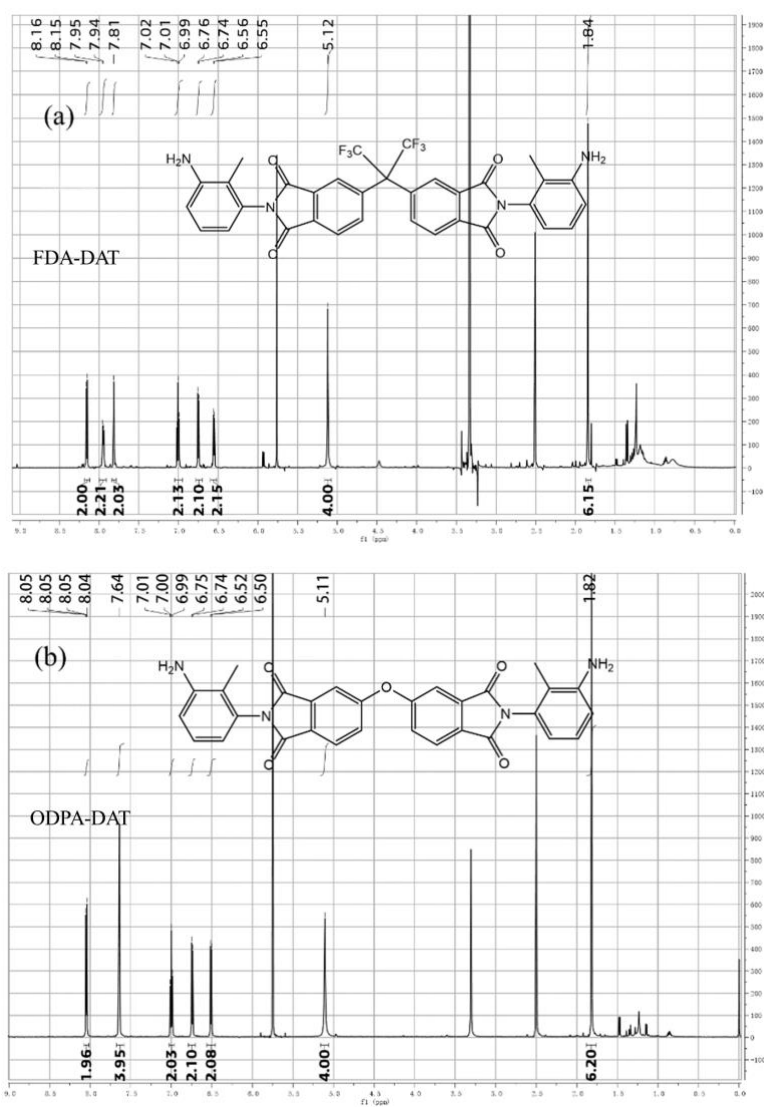

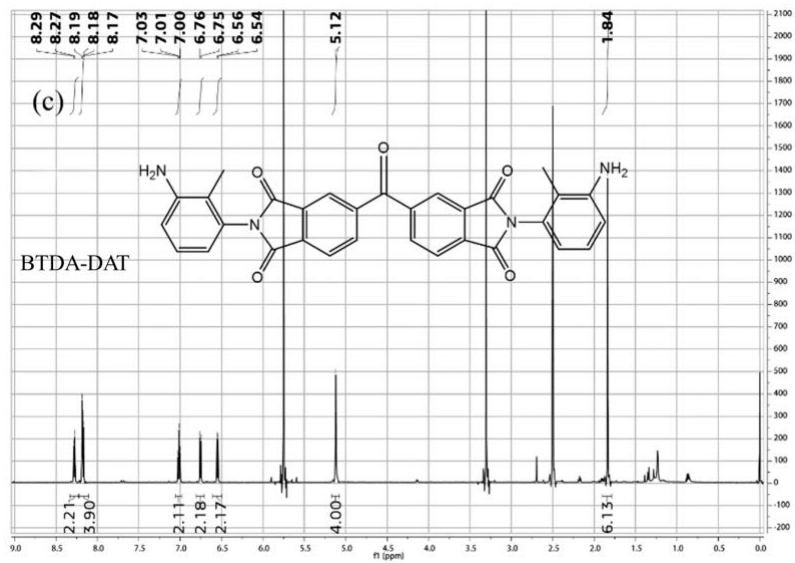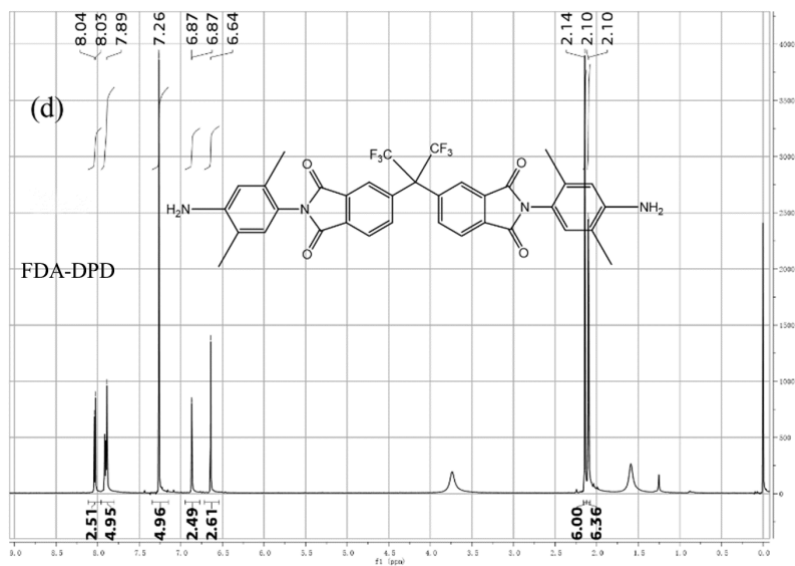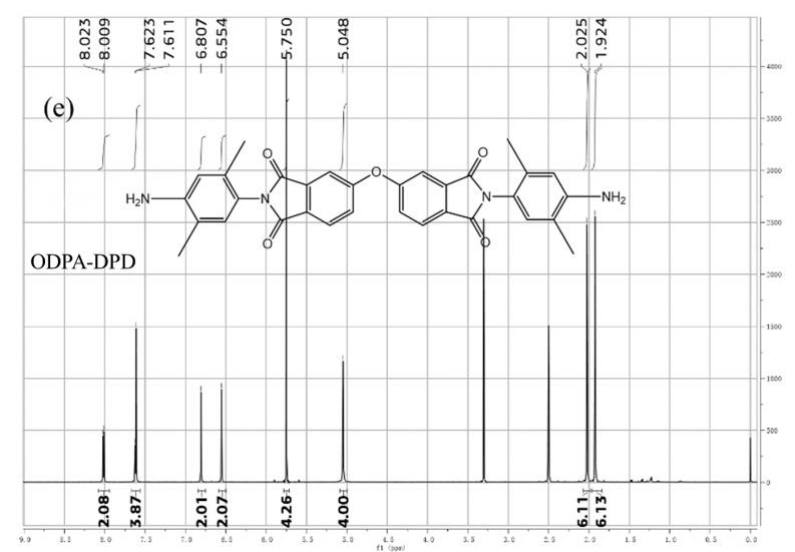

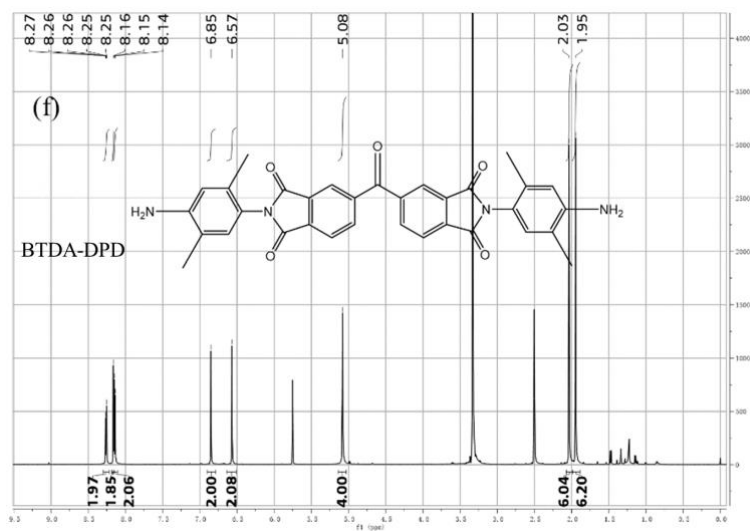

**Figure S1.**  $^1\text{H}$ -NMR spectra of FDA-DAT, ODPA-DAT, BTDA-DAT, FDA-DPD, BTDA-DPD in DMSO- $d_6$  and ODPA-DPD in  $\text{CDCl}_3$ .

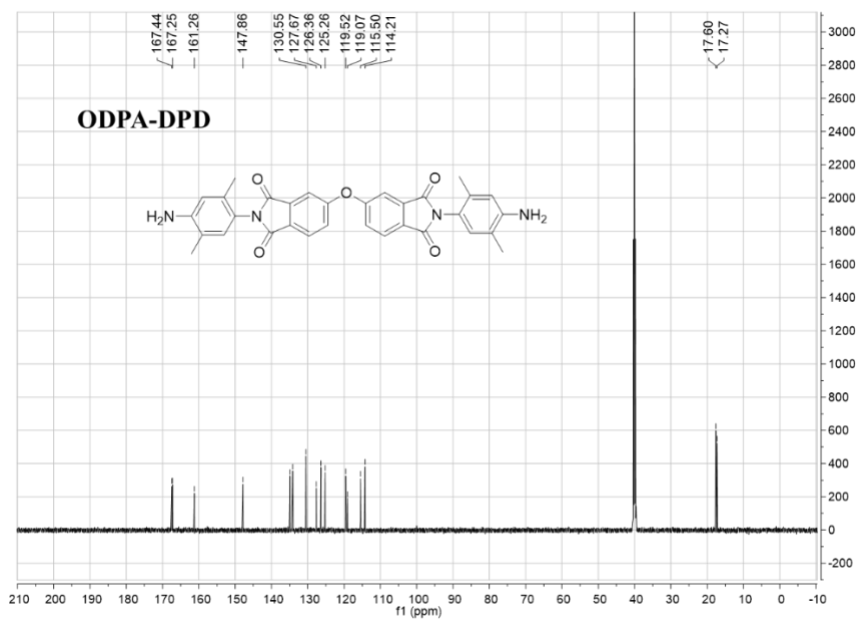

**Figure S2.**  $^{13}\text{C}$ -NMR spectrum of ODPA-DPD in  $\text{CDCl}_3$

## 2.2 FT-IR spectra of hybrid films and TPA

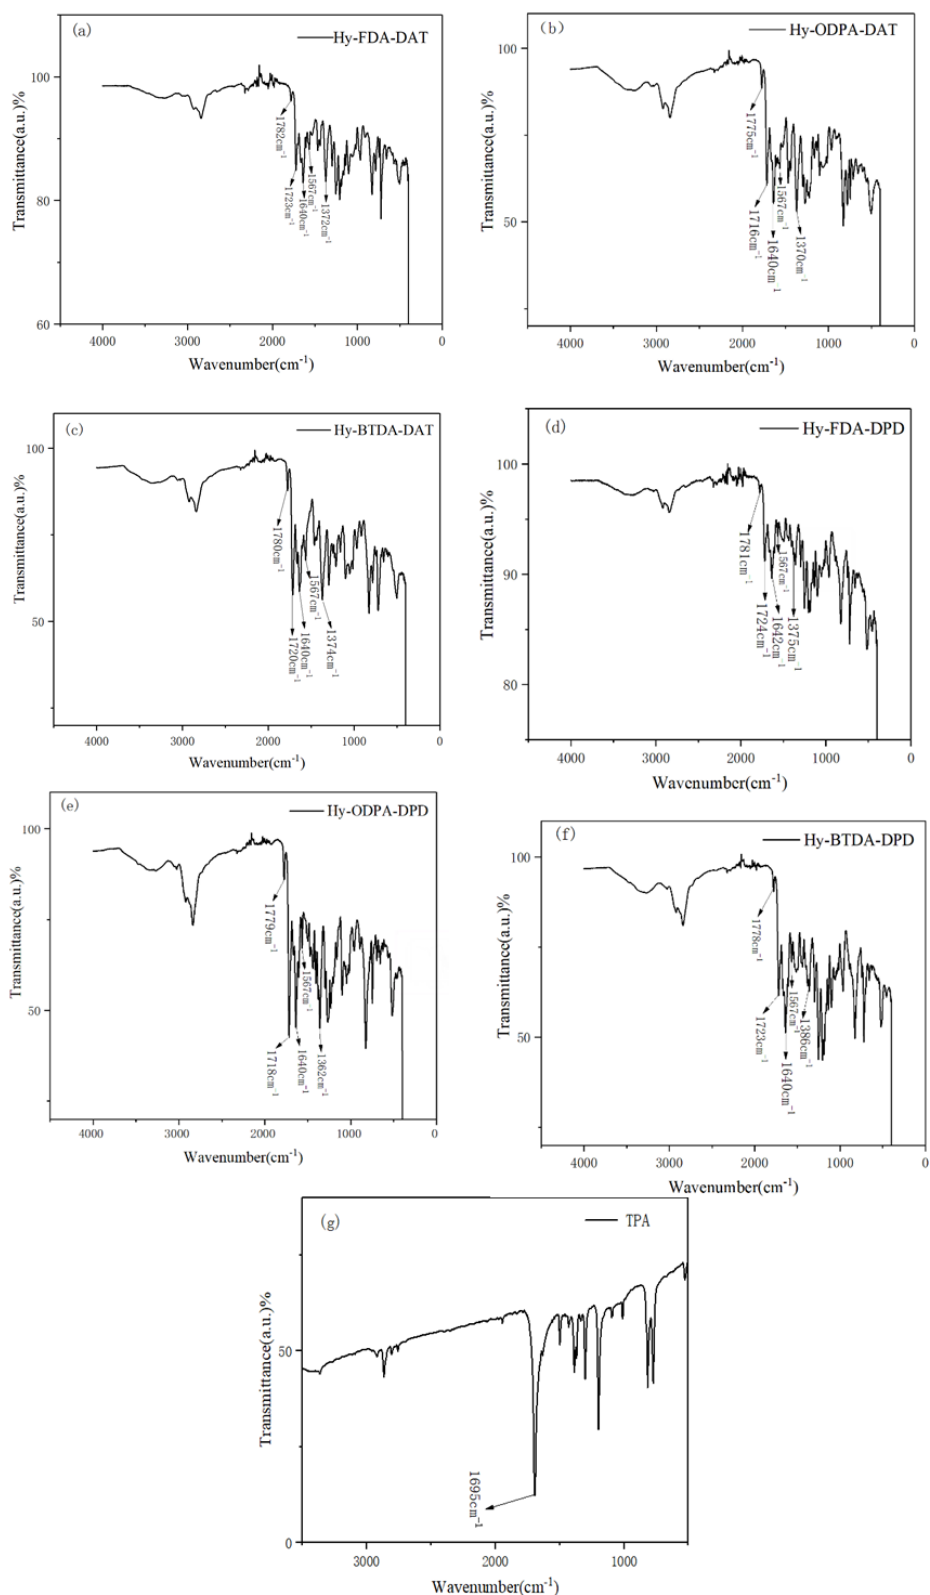

**Figure S3** FT-IR spectra of Hy-FDA-DAT (a), Hy-ODPA-DAT (b), Hy-BTDA-DAT (c), Hy-FDA-DPD (d), Hy-ODPA-DPD (e), Hy-BTDA-DPD (f), and TPA (g).

## 2.3 Solid-state $^{13}\text{C}$ NMR spectra of hybrid materials

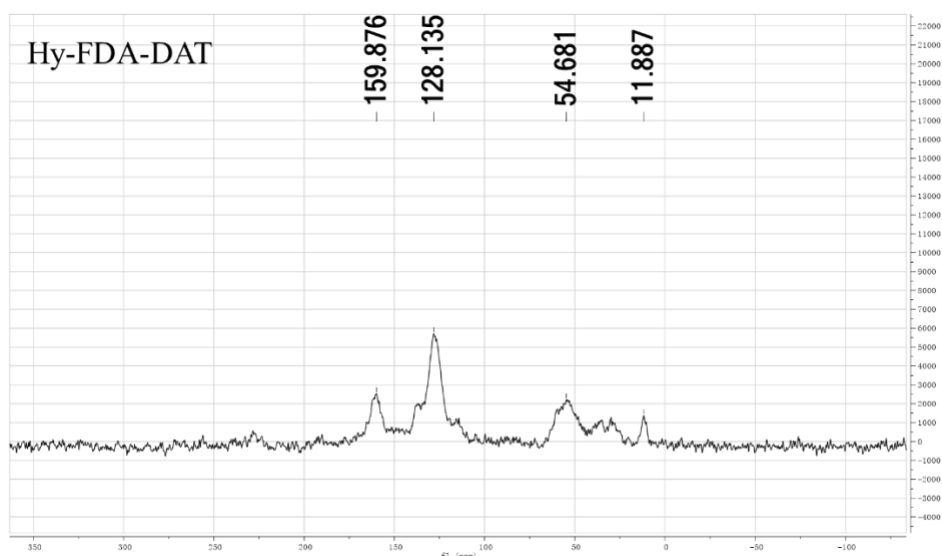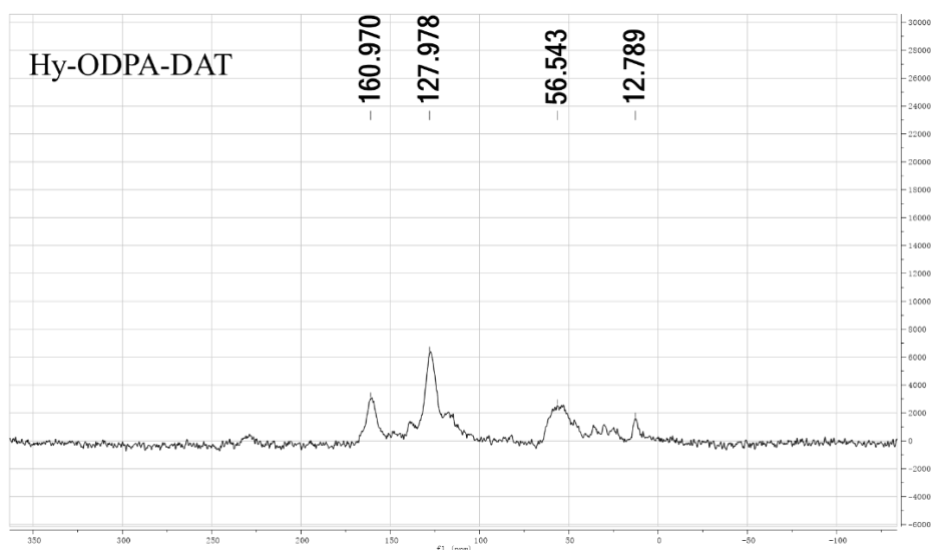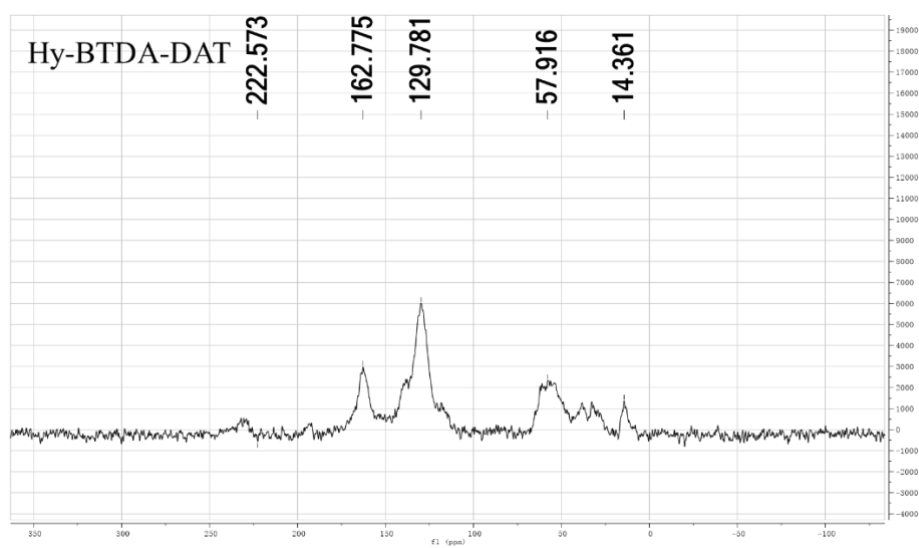

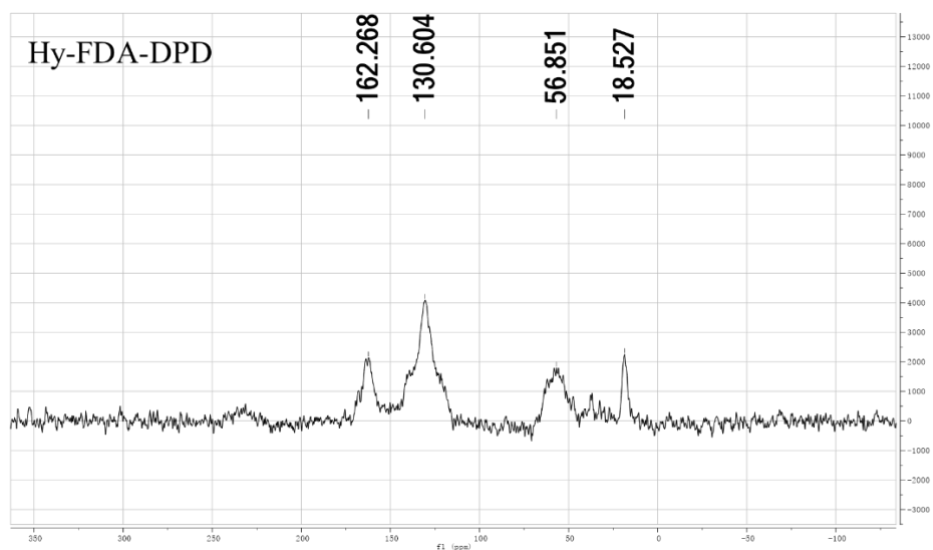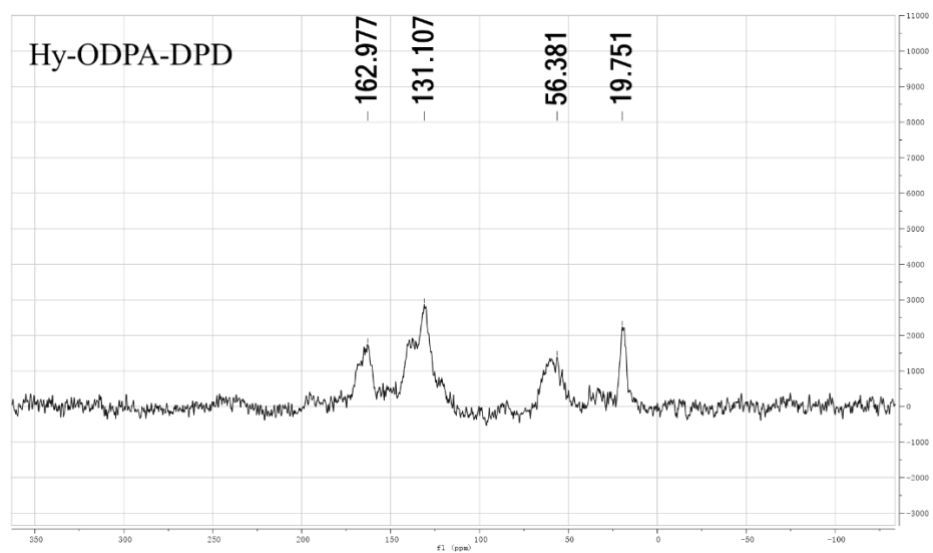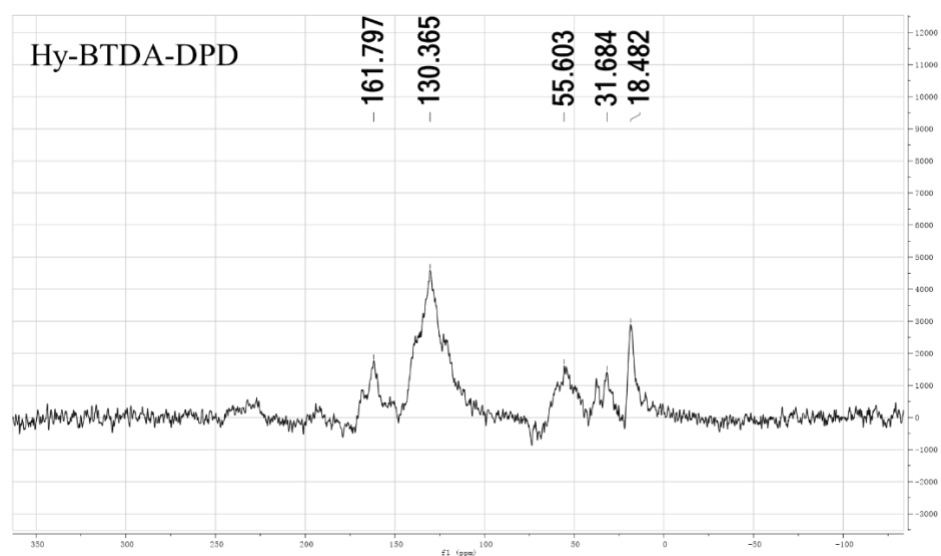

**Figure S4** Solid-state  $^{13}\text{C}$ -NMR spectra of PIm-PI powders.



## 2.4 Atomic force microscopy images of the hybrid films

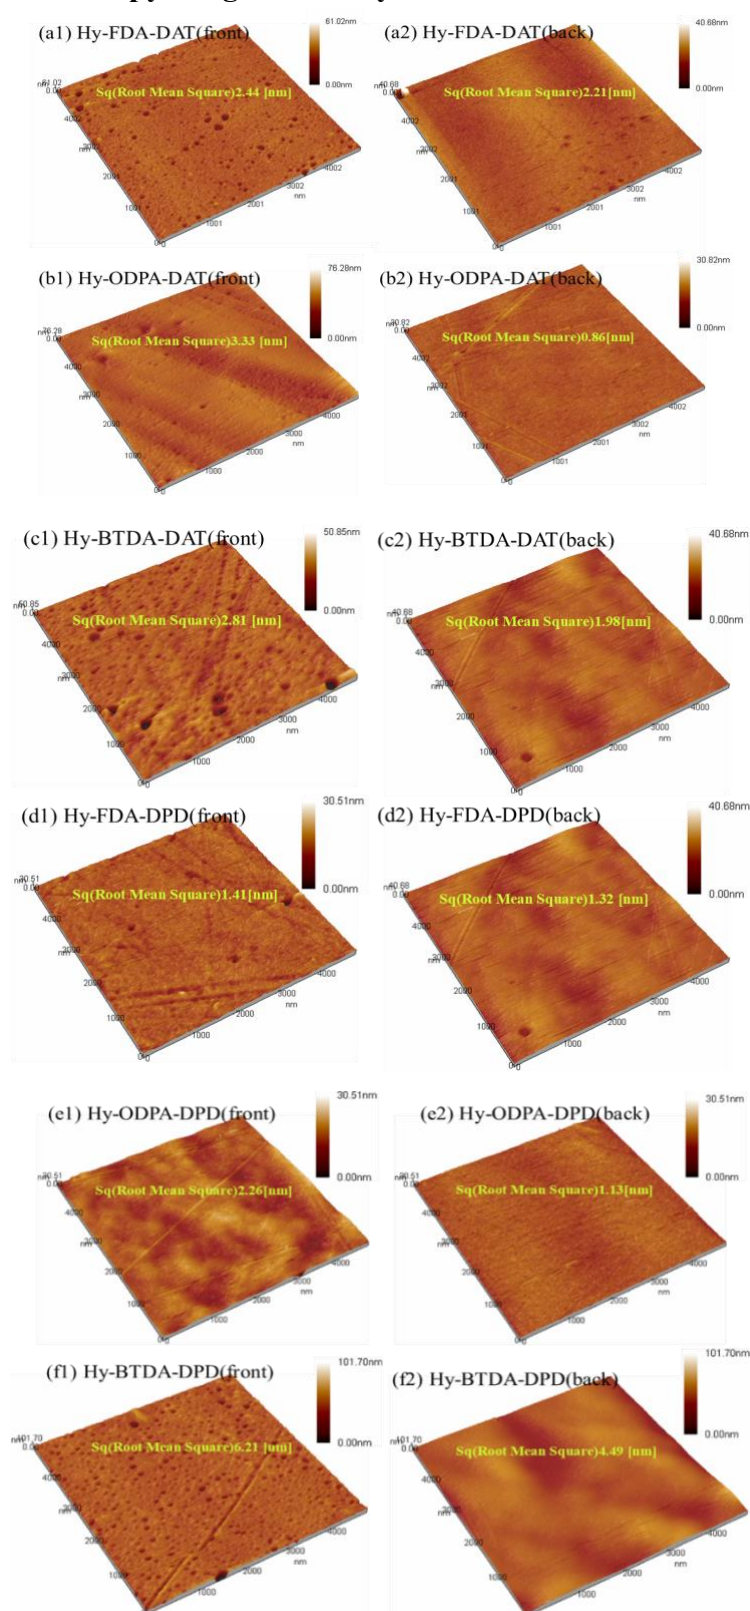

**Figure S5** AFM images of PIm-PIs films (front: the top side in contact with air, back: the bottom side in contact with the glass dish of the film during the preparation).

## 2.5 Mechanical properties of the hybrid films

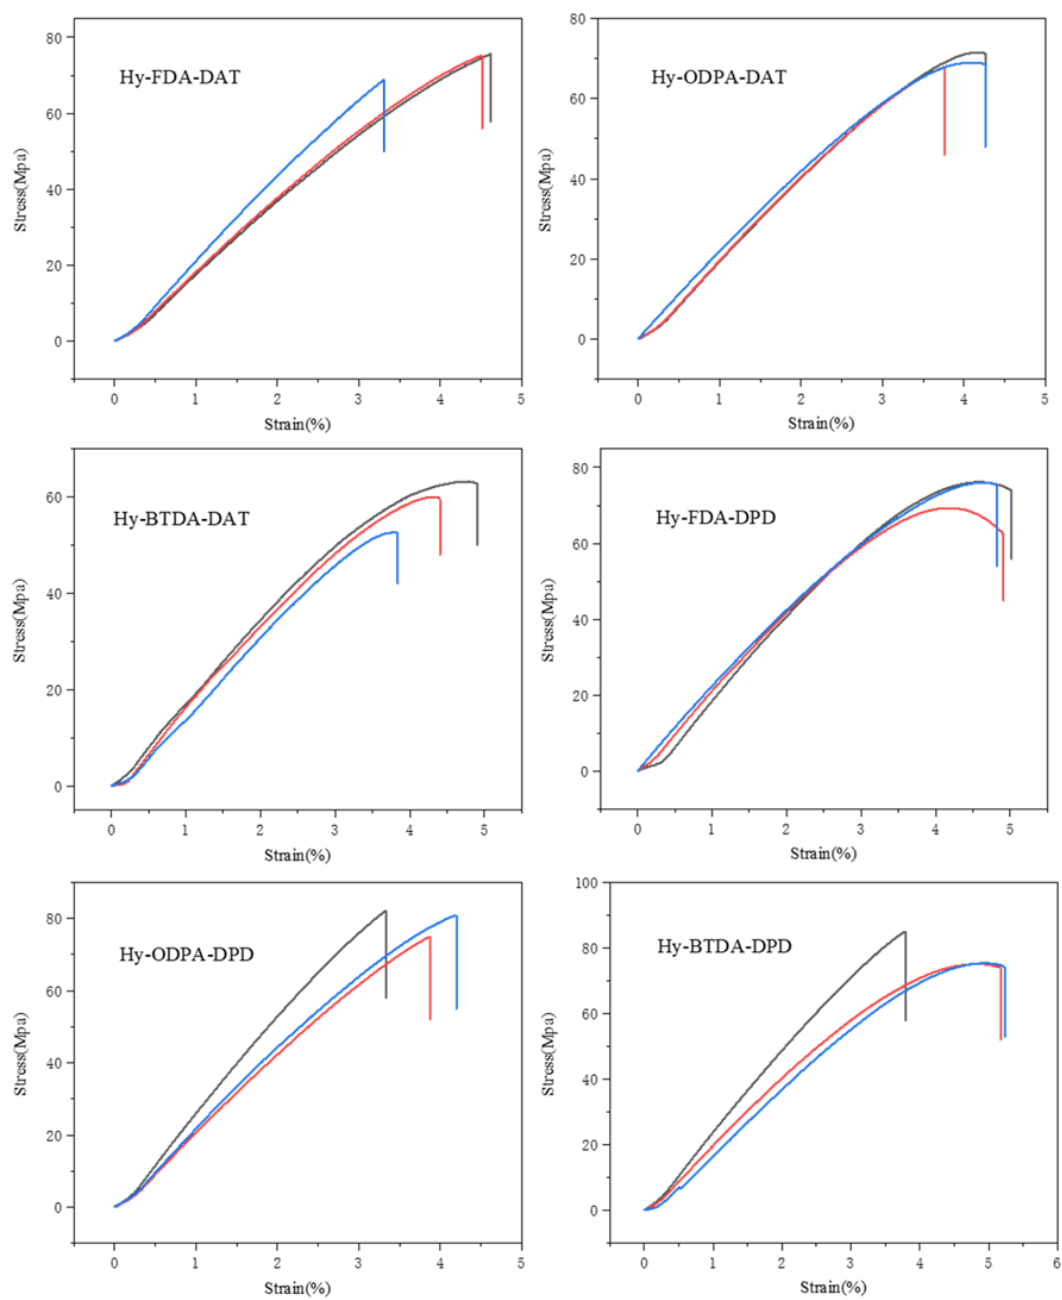

**Figure S6** Tensile stress-strain curves of the as-synthesized hybrid films. Three different samples were tested for each material.

## 2.6 Dynamic mechanical analysis (DMA) of the hybrid films

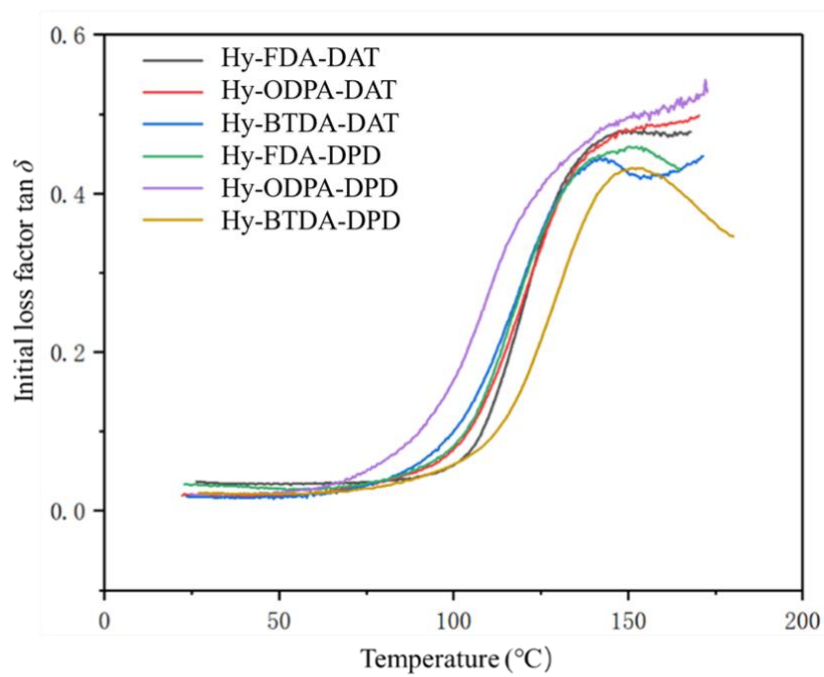

**Figure S7** Initial loss factor  $\tan \delta$  curves of PIm-PIs films.

## 2.7 Thermal gravimetric analysis (TGA) of the hybrid films

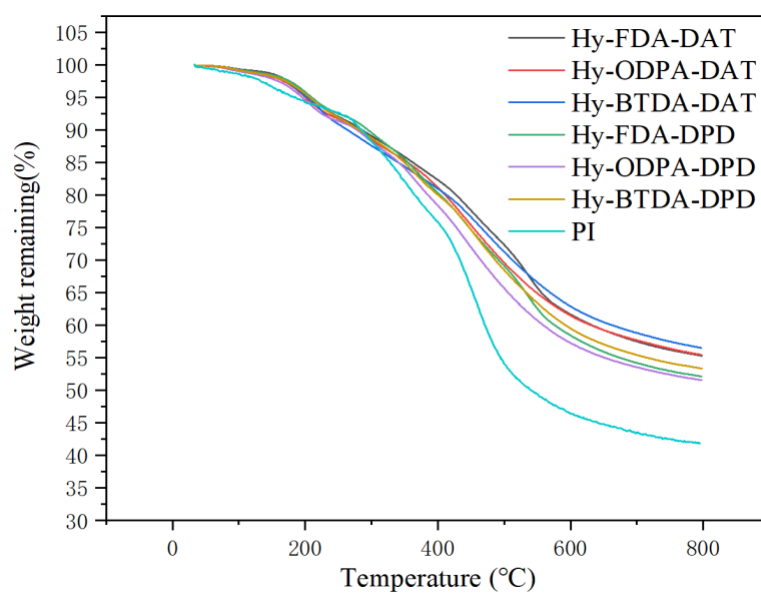

**Figure S8** TGA curves of the PIm-PIs films and PI film

**Table S1** TGA analysis of PIm-PIs and PI

| materials   | T <sub>d</sub> 5% | T <sub>d</sub> 10% | residue@600 °C | residue@800 °C |
|-------------|-------------------|--------------------|----------------|----------------|
| Hy-FDA-DAT  | 208 °C            | 285 °C             | 62%            | 55%            |
| Hy-ODPA-DAT | 200 °C            | 279 °C             | 62%            | 55%            |
| Hy-BTDA-DAT | 203 °C            | 263 °C             | 63%            | 56%            |
| Hy-FDA-DPD  | 210 °C            | 294 °C             | 58%            | 52%            |
| Hy-ODPA-DPD | 196 °C            | 277 °C             | 57%            | 51%            |
| Hy-BTDA-DPD | 206 °C            | 282 °C             | 60%            | 53%            |
| PI          | 187 °C            | 286 °C             | 46%            | 41%            |

### 3. Repairing of the hybrid films

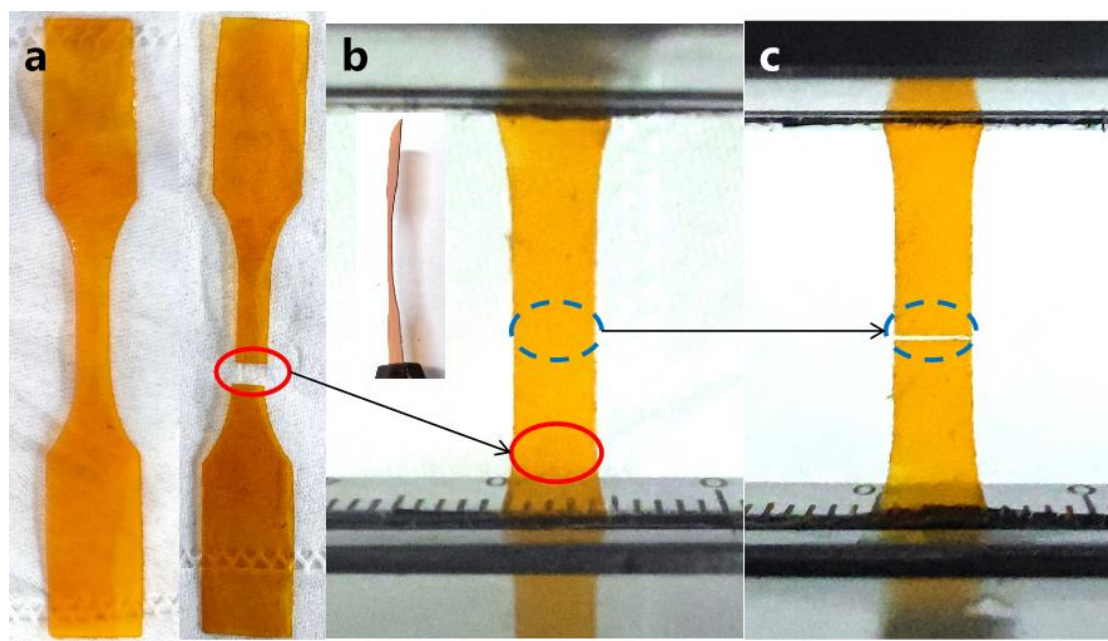

**Figure S9** The optical images of the PIm-PI (Hy-ODPA-DAT) film before (a, left: as-synthesized, right: cut piece) and after heat-pressing (b), and after the second tensile testing (c). The rehealed positions are indicated by the red circles, and the dashed blue circles indicate the new fractured locations.

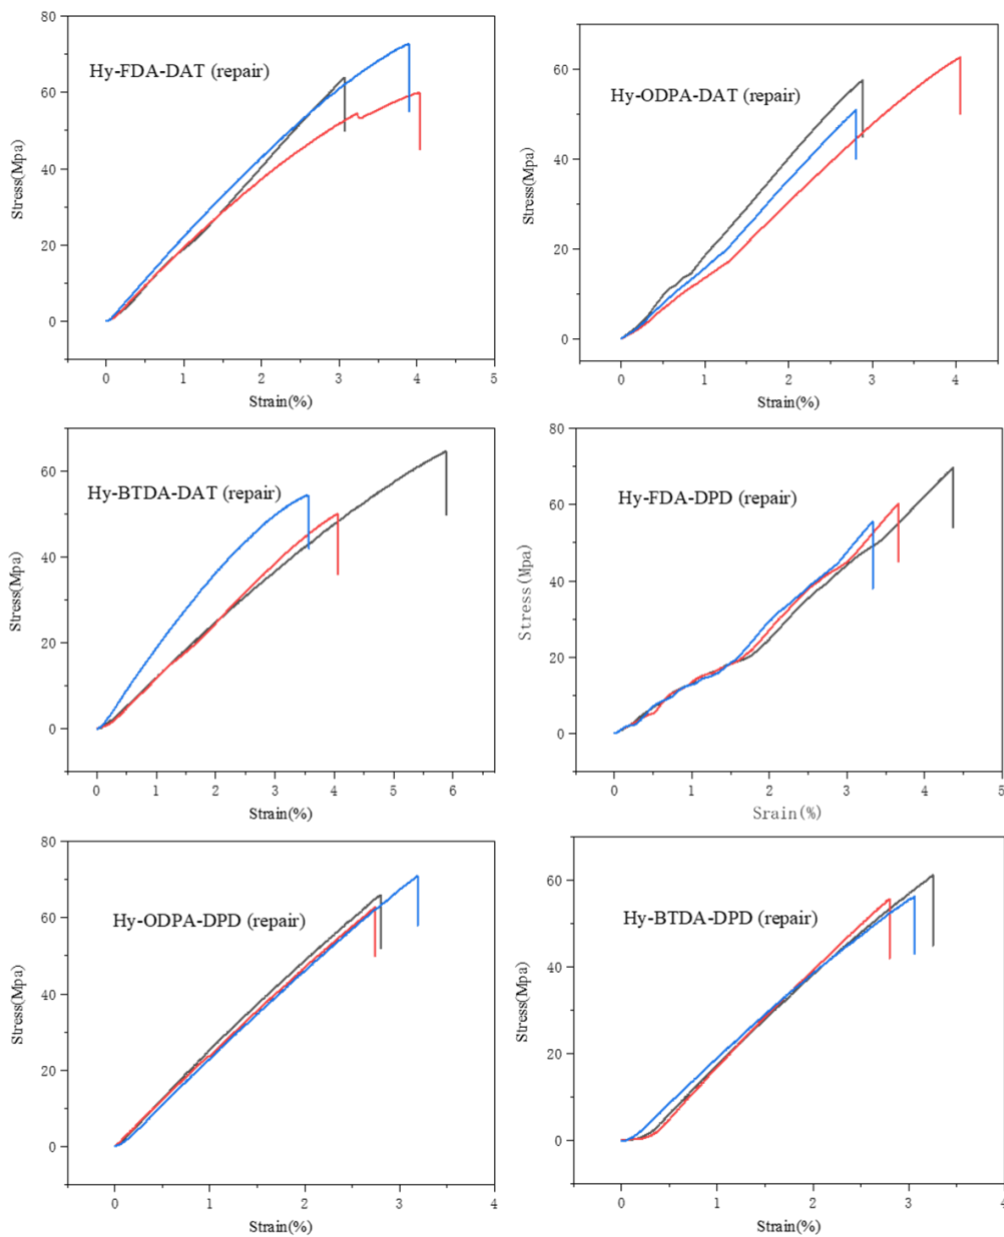

**Figure S10** Tensile stress-strain curves of the as-synthesized hybrid films after repair. Three different samples were tested for each material.

**Table S2 The mechanical properties of hybrid films before and after repair**

| Sample            |                   |          | Tensile Modulus (GPa) | Tensile Strength (MPa) | Elongation at break (%) |
|-------------------|-------------------|----------|-----------------------|------------------------|-------------------------|
| Hy-FDA-DAT        | original          | average  | 2.1132±0.17           | 73.1964±3.10           | 4.1473±0.59             |
|                   |                   | 01       | 1.9591                | 75.5832                | 4.6187                  |
|                   |                   | 02       | 2.0197                | 75.1916                | 4.5142                  |
|                   |                   | 03       | 2.3607                | 68.8143                | 3.3090                  |
|                   | repair            | average  | 2.1376±0.14           | 65.496±5.36            | 3.6682±0.43             |
|                   |                   | 01       | 2.2912                | 63.8864                | 3.0707                  |
|                   |                   | 02       | 1.9505                | 59.8862                | 4.036                   |
|                   |                   | 03       | 2.1711                | 72.7154                | 3.898                   |
|                   | Repair efficiency |          | 101%                  | 89%                    | 88%                     |
|                   | Hy-ODPA-DAT       | original | average               | 2.1646±0.04            | 69.3695±1.64            |
| 01                |                   |          | 2.1792                | 71.5577                | 4.2689                  |
| 02                |                   |          | 2.2096                | 67.5944                | 3.7614                  |
| 03                |                   |          | 2.1049                | 68.9565                | 4.2635                  |
| repair            |                   | average  | 2.0250±0.19           | 56.9773±4.79           | 3.2474±0.57             |
|                   |                   | 01       | 2.2766                | 57.4532                | 2.8837                  |
|                   |                   | 02       | 1.8011                | 62.5962                | 4.0546                  |
|                   |                   | 03       | 1.9974                | 50.8824                | 2.804                   |
| Repair efficiency |                   |          | 94%                   | 82%                    | 79%                     |
| Hy-BTDA-DAT       |                   | original | average               | 1.7875±0.09            | 58.5119±4.51            |
|                   | 01                |          | 1.6768                | 63.1792                | 4.9067                  |
|                   | 02                |          | 1.8873                | 59.9501                | 4.406                   |
|                   | 03                |          | 1.7985                | 52.4064                | 3.841                   |
|                   | repair            | average  | 1.8873±0.38           | 56.3199±6.09           | 4.5056±0.99             |
|                   |                   | 01       | 1.9052                | 54.3828                | 3.571                   |
|                   |                   | 02       | 2.3461                | 64.5549                | 5.8870                  |
|                   |                   | 03       | 1.4107                | 50.0221                | 4.059                   |
|                   | Repair efficiency |          | 106%                  | 96%                    | 103%                    |
|                   | Hy-FDA-DPD        | original | average               | 2.2327±0.08            | 73.8496±3.20            |
| 01                |                   |          | 2.3165                | 76.1634                | 5.019                   |
| 02                |                   |          | 2.2637                | 69.3266                | 4.9121                  |
| 03                |                   |          | 2.1180                | 76.0587                | 4.8236                  |
| repair            |                   | average  | 2.1168±0.24           | 61.8471±4.02           | 3.7862±0.43             |
|                   |                   | 01       | 2.0259                | 69.6602                | 4.3661                  |
|                   |                   | 02       | 2.1424                | 55.5794                | 3.3315                  |
|                   |                   | 03       | 2.1821                | 60.3017                | 3.6611                  |
| Repair            |                   |          | 95%                   | 84%                    | 77%                     |

|                   |                   |          |             |              |              |
|-------------------|-------------------|----------|-------------|--------------|--------------|
|                   | efficiency        |          |             |              |              |
| Hy-ODPA-DPD       | original          | average  | 2.4939±0.23 | 79.2154±3.15 | 3.8017±0.36  |
|                   |                   | 01       | 2.8126      | 82.1108      | 3.3311       |
|                   |                   | 02       | 2.2631      | 74.8389      | 3.8749       |
|                   |                   | 03       | 2.4061      | 80.6964      | 4.1991       |
|                   | repair            | average  | 2.4336±0.07 | 66.4677±3.38 | 2.9097±0.20  |
|                   |                   | 02       | 2.5336      | 65.8388      | 2.8011       |
|                   |                   | 03       | 2.3840      | 70.8872      | 3.189        |
|                   |                   | 04       | 2.3831      | 62.6770      | 2.739        |
|                   | Repair efficiency |          | 98%         | 84%          | 77%          |
|                   | Hy-BTDA-DPD       | original | average     | 2.2333±0.33  | 78.4486±4.55 |
| 01                |                   |          | 2.6358      | 84.8812      | 3.7922       |
| 02                |                   |          | 1.8331      | 75.3615      | 5.236        |
| 03                |                   |          | 2.2310      | 75.1030      | 5.172        |
| repair            |                   | average  | 2.2258±0.09 | 57.6996±2.50 | 3.0387±0.19  |
|                   |                   | 01       | 2.2415      | 61.2232      | 3.253        |
|                   |                   | 02       | 2.3360      | 55.6425      | 2.7991       |
|                   |                   | 03       | 2.1000      | 56.2330      | 3.064        |
| Repair efficiency |                   |          | 100%        | 74%          | 64%          |
| PI                |                   | original | average     | 1.2196±0.07  | 36.8526±0.27 |
|                   | 01                |          | 1.1762      | 36.8552      | 4.353        |
|                   | 02                |          | 1.3197      | 36.5237      | 3.945        |
|                   | 03                |          | 1.1628      | 37.1789      | 4.728        |
|                   | repair            | average  | 1.2475±0.05 | 43.7047±1.56 | 4.3733±0.31  |
|                   |                   | 01       | 1.2683      | 43.1827      | 4.404        |
|                   |                   | 02       | 1.1806      | 45.8295      | 4.735        |
|                   |                   | 03       | 1.2936      | 42.1019      | 3.981        |
|                   | Repair efficiency |          | 102%        | 119%         | 101%         |



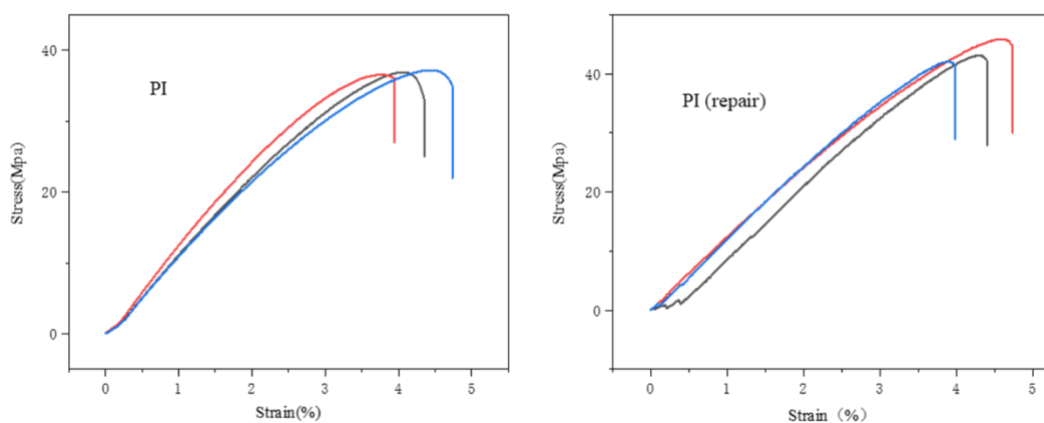

**Figure S11** Tensile stress-strain curves of PI before and after repair. Three different samples were tested.

#### 4. Recycling of the hybrid films

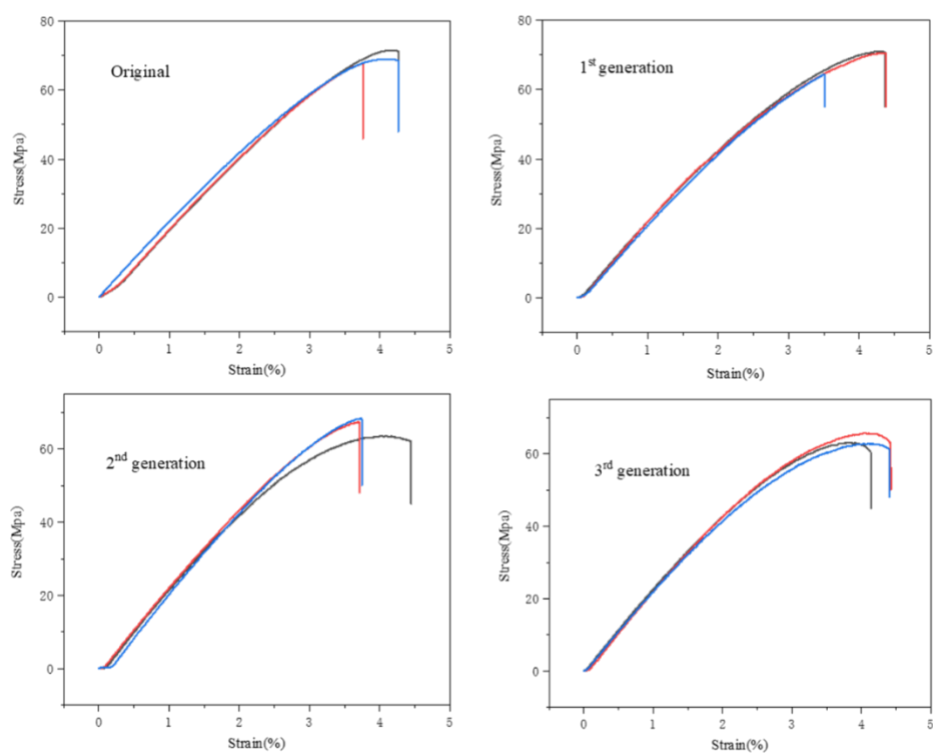

**Figure S12** Tensile stress-strain curves of Hy-ODPA-DAT sample with three depolymerization-reformation process. Three different samples were tested for each material.

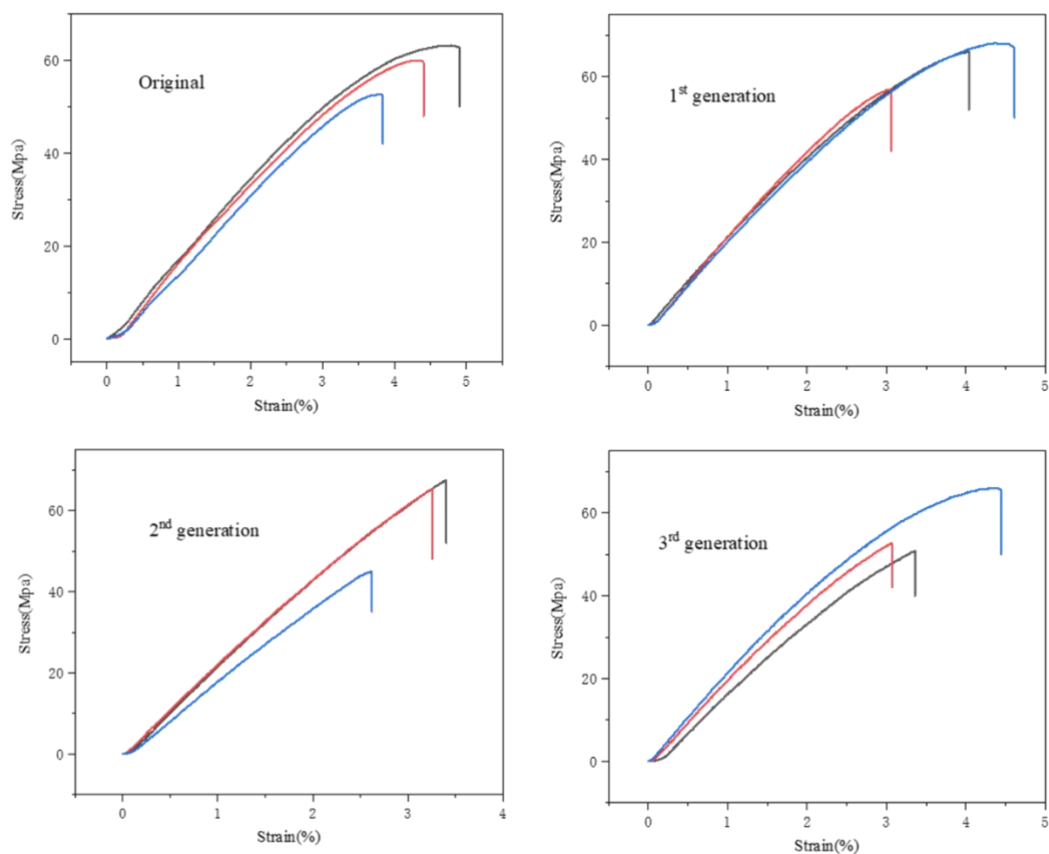

**Figure S13** Tensile stress-strain curves of Hy-BTDA-DAT sample with three depolymerization-reformation process. Three different samples were tested for each material.

**Table S3** The mechanical properties of Hy-ODPA-DAT and Hy-BTDA-DAT after 3 generation recycling.

| Sample      |                            | Tensile Modulus (GPa) | Tensile Strength (MPa) | Elongation at break (%) |              |
|-------------|----------------------------|-----------------------|------------------------|-------------------------|--------------|
| Hy-ODPA-DAT | original                   | average               | 2.1646±0.044           | 69.3695±1.644           | 4.0979±0.238 |
|             |                            | 01                    | 2.1792                 | 71.5577                 | 4.2689       |
|             |                            | 02                    | 2.2096                 | 67.5944                 | 3.7614       |
|             |                            | 03                    | 2.1049                 | 68.9565                 | 4.2635       |
|             | 1 <sup>st</sup> generation | average               | 2.2013±0.026           | 68.5989±2.973           | 4.0844±0.407 |
|             |                            | 01                    | 2.1794                 | 70.9069                 | 4.364        |
|             |                            | 02                    | 2.2383                 | 70.4892                 | 4.381        |
|             |                            | 03                    | 2.1862                 | 64.4007                 | 3.5082       |
|             | 2 <sup>nd</sup> generation | average               | 2.2768±0.071           | 66.3281±2.103           | 3.9667±0.339 |
|             |                            | 01                    | 2.2298                 | 63.4003                 | 4.446        |
|             |                            | 02                    | 2.3775                 | 68.2449                 | 3.745        |
|             |                            | 03                    | 2.2231                 | 67.3390                 | 3.709        |
|             | 3 <sup>rd</sup> generation | average               | 2.2270±0.031           | 63.7695±1.311           | 4.3240±0.129 |
|             |                            | 01                    | 2.2061                 | 62.9560                 | 4.1421       |
|             |                            | 02                    | 2.2713                 | 65.6203                 | 4.424        |
|             |                            | 03                    | 2.2036                 | 62.7323                 | 4.406        |
| Hy-BTDA-DAT | original                   | average               | 1.7875±0.086           | 58.5119±4.514           | 4.3846±0.435 |
|             |                            | 01                    | 1.6768                 | 63.1792                 | 4.9067       |
|             |                            | 02                    | 1.8873                 | 59.9501                 | 4.406        |
|             |                            | 03                    | 1.7985                 | 52.4064                 | 3.841        |
|             | 1 <sup>st</sup> generation | average               | 2.0868±0.073           | 63.6671±4.857           | 3.9023±0.641 |
|             |                            | 01                    | 2.0949                 | 66.0955                 | 4.037        |
|             |                            | 02                    | 2.1715                 | 56.8889                 | 3.059        |
|             |                            | 03                    | 1.9940                 | 68.0170                 | 4.611        |
|             | 2 <sup>nd</sup> generation | average               | 2.1416±0.155           | 59.2366±10.140          | 3.094±0.339  |
|             |                            | 01                    | 2.2738                 | 67.4309                 | 3.403        |
|             |                            | 02                    | 2.2265                 | 65.3306                 | 3.257        |
|             |                            | 03                    | 1.9246                 | 44.9482                 | 2.621        |
|             | 3 <sup>rd</sup> generation | average               | 1.9798±0.147           | 56.4484±6.762           | 3.622±0.590  |
|             |                            | 01                    | 1.7817                 | 50.7321                 | 3.359        |
|             |                            | 02                    | 2.0235                 | 52.6669                 | 3.068        |
|             |                            | 03                    | 2.1343                 | 65.9461                 | 4.439        |
